# Supplementary material for: Pinocchio et Barbie prennent le Transatlantique. A propos des expositions d’Olivier Rebufa et de Jim Dine
Source: Royal Society of Chemistry journal article supplement (doi:10.1039/c9sm00465c), 2007-11-15
Supplement: c9sm00465c1.pdf [file c9sm00465c1.pdf]

## Electronic Supplementary Information

### Role of water in the formation of unusual organogels with *cyclo*(leucyl-leucyl)

Aisylu S. Safiullina,<sup>a</sup> Sufia A. Ziganshina,<sup>b</sup> Nikolay M. Lyadov,<sup>b</sup> Alexander E. Klimovitskii,<sup>a</sup> Marat A. Ziganshin,<sup>\*a</sup> Valery V. Gorbachuk<sup>a</sup>

<sup>a</sup> *A.M. Butlerov Institute of Chemistry, Kazan Federal University, Kremlevskaya ul. 18, Kazan, 420008 Russia.*

<sup>b</sup> *Zavoisky Physical-Technical Institute of FRC Kazan Scientific Center of the Russian Academy of Sciences, Sibirskii trakt 10/7, Kazan, 420029 Russia.*

- AFM images of the surface of dried gel of *cyclo*(Leu-Leu) on the silicon substrate.
- Gelation ability and minimum gelation concentration of *cyclo*(Leu-Leu) in the systems studied.
- Data of DSC analysis for gel of *cyclo*(Leu-Leu) in benzene with water.

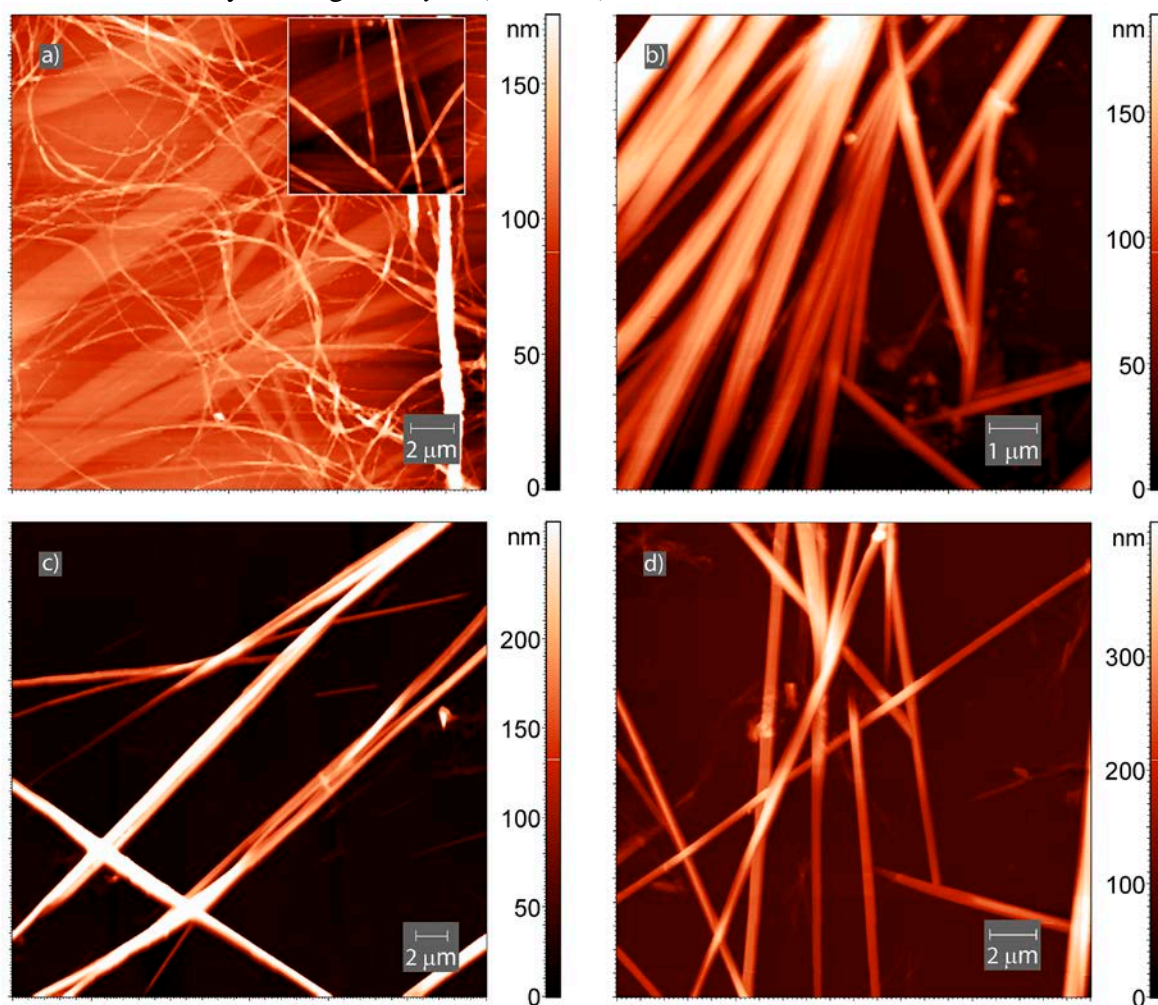

**Fig. S1.** AFM images of the surface of dried *cyclo*(Leu-Leu) gel (xerogel) in (a) benzene, (b) toluene (c) o-xylene and (d) ethylbenzene on the silicon substrate.

In organogel with toluene, fibers with a length of more than 20  $\mu\text{m}$  and width from 300 nm to 1.5  $\mu\text{m}$  are formed, Fig. S1 b. Such fibers have a complex structure and are bundles of smaller fibers about 150 nm wide. In the xerogel formed from *o*-xylene there are twisted fibers more than 30  $\mu\text{m}$  in length, which are consist from the individual fibers of 350 - 700 nm wide and 100 - 300 nm height, Fig. S1 c. The fibers of width from 500 nm to 1.2  $\mu\text{m}$  and height from 40 nm to 250 nm were formed in ethylbenzene, Fig. S1 d.

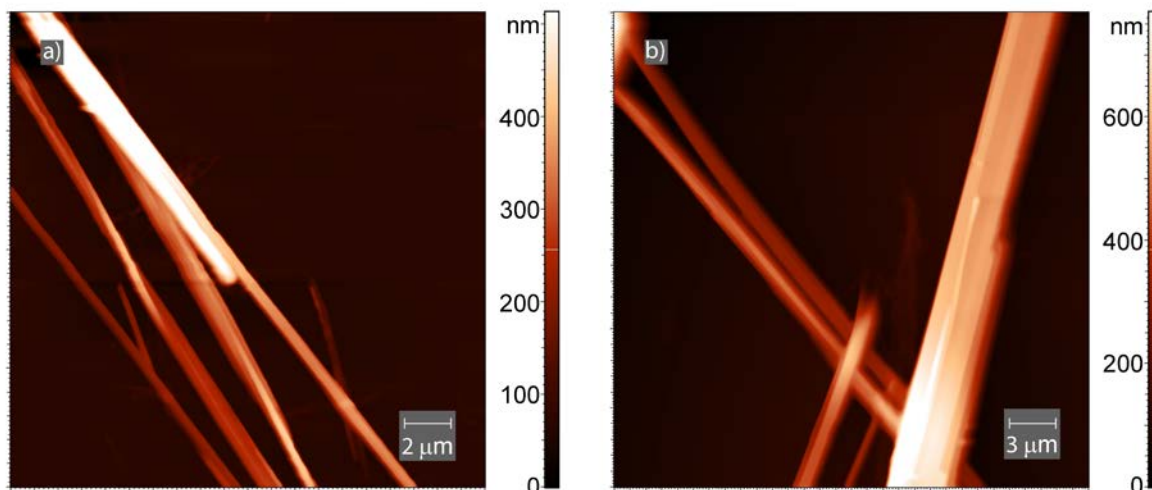

**Fig. S2.** AFM images of the surface of dried gel of *cyclo*(Leu-Leu) in (a) *o*-xylene ( $1.5 \text{ mg mL}^{-1}$ ,  $20 \mu\text{L H}_2\text{O}$ ) and (b) ethylbenzene ( $2.5 \text{ mg mL}^{-1}$ ,  $20 \mu\text{L H}_2\text{O}$ ) on the silicon substrate.

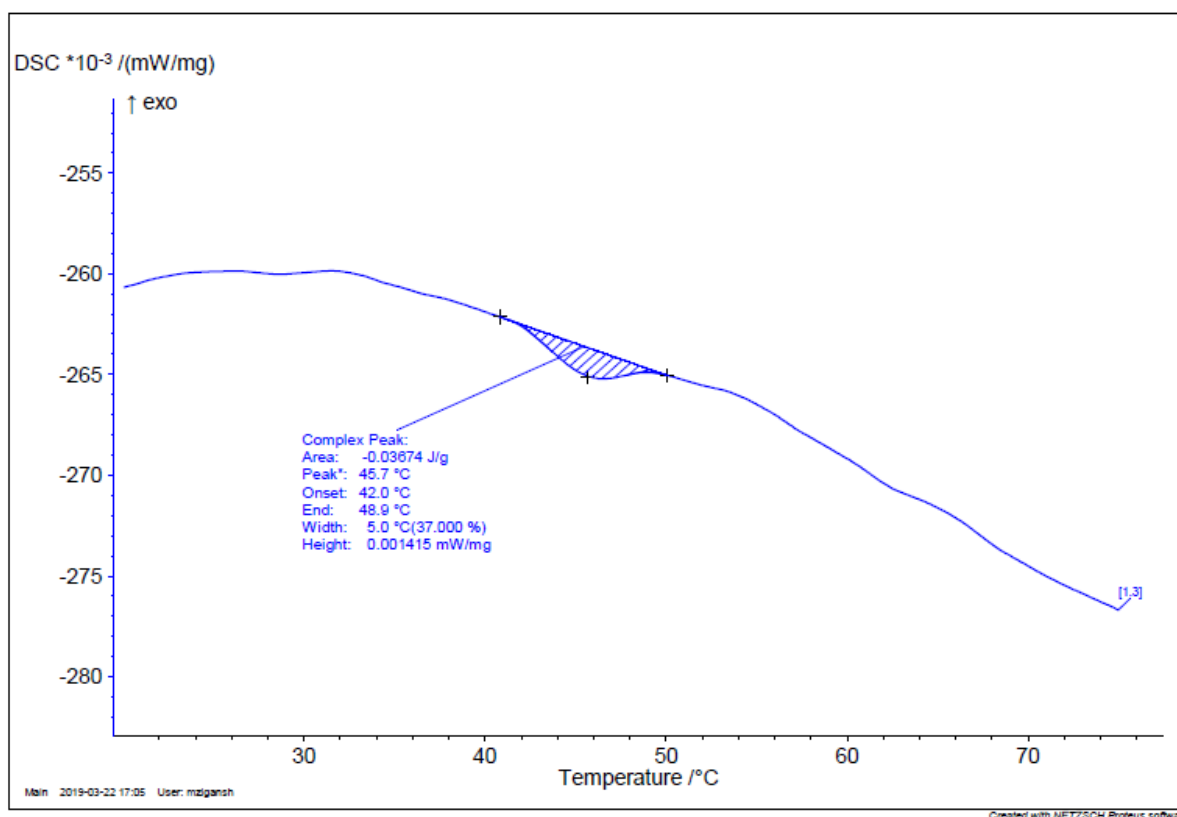

**Fig. S3.** Data of DSC analysis for gel of *cyclo*(Leu-Leu) in benzene with water.

**Table S1.** Gelation ability and concentration of *cyclo*(Leu-Leu) in the systems with 1 mL of solvent without shaking.<sup>a</sup>

| Solvent                 | Concentration of <i>cyclo</i> (Leu-Leu), mg mL <sup>-1</sup> |                 |                 |                 |                 |                 |
|-------------------------|--------------------------------------------------------------|-----------------|-----------------|-----------------|-----------------|-----------------|
|                         | 1.5                                                          | 2               | 2.5             | 3               | 4               | 5               |
| Benzene                 | G <sup>c</sup>                                               | G <sup>c</sup>  | G <sup>c</sup>  | G <sup>b</sup>  | G <sup>b</sup>  | G <sup>b</sup>  |
| Toluene                 | G <sup>c</sup>                                               | G <sup>c</sup>  | G <sup>c</sup>  | G <sup>b</sup>  | G <sup>b</sup>  | G <sup>b</sup>  |
| <i>o</i> -Xylene        | G <sup>d</sup>                                               | PG <sup>c</sup> | G <sup>c</sup>  | G <sup>b</sup>  | G <sup>b</sup>  | G <sup>b</sup>  |
| <i>m</i> -Xylene        | G <sup>d</sup>                                               | G <sup>c</sup>  | G <sup>c</sup>  | G <sup>b</sup>  | G <sup>b</sup>  | G <sup>b</sup>  |
| <i>p</i> -Xylene        | G <sup>d</sup>                                               | G <sup>c</sup>  | G <sup>c</sup>  | G <sup>b</sup>  | G <sup>b</sup>  | G <sup>b</sup>  |
| Ethylbenzene            | PG <sup>c</sup>                                              | PG <sup>c</sup> | PG <sup>c</sup> | G <sup>c</sup>  | G <sup>c</sup>  | G <sup>b</sup>  |
| <i>sec</i> -Amylbenzene | PG <sup>c</sup>                                              | PG <sup>c</sup> | PG <sup>c</sup> | PG <sup>c</sup> | PG <sup>c</sup> | PG <sup>c</sup> |
| <i>n</i> -Hexane        | I                                                            | I               | I               | I               | I               | I               |
| <i>n</i> -Heptane       | I                                                            | I               | I               | I               | I               | I               |
| Cyclohexane             | I                                                            | I               | I               | I               | I               | I               |
| Tetrachloromethane      | I                                                            | I               | I               | I               | I               | I               |
| Tetrachloroethylene     | PG <sup>d</sup>                                              | PG <sup>d</sup> | PG <sup>d</sup> | G <sup>c</sup>  | G <sup>c</sup>  | G <sup>c</sup>  |

<sup>a</sup> MGC is the minimum value of *cyclo*(Leu-Leu) concentration indicated by letters G or PG, where G – complete gelation, PG – partial gelation, I – insoluble; <sup>b</sup> after one day; <sup>c</sup> after two days; <sup>d</sup> after three days.

**Table S2.** Gelation ability and concentration of *cyclo*(Leu-Leu) in the systems with 0.5 mL of solvent without shaking.<sup>a</sup>

| Solvent             | MGC, mg mL <sup>-1</sup> |                 |                |
|---------------------|--------------------------|-----------------|----------------|
|                     | 1.5                      | 2               | 2.5            |
| Benzene             | G <sup>c</sup>           | G <sup>c</sup>  | G <sup>d</sup> |
| Toluene             | G <sup>c</sup>           | G <sup>d</sup>  | G <sup>d</sup> |
| <i>o</i> -Xylene    | G <sup>d</sup>           | G <sup>d</sup>  | G <sup>c</sup> |
| <i>m</i> -Xylene    | G <sup>d</sup>           | G <sup>b</sup>  | G <sup>b</sup> |
| <i>p</i> -Xylene    | G <sup>b</sup>           | G <sup>b</sup>  | G <sup>d</sup> |
| Ethylbenzene        | G <sup>c</sup>           | G <sup>c</sup>  | G <sup>d</sup> |
| Tetrachloroethylene | PG <sup>d</sup>          | PG <sup>d</sup> | G <sup>d</sup> |

<sup>a</sup> MGC is the minimum value of *cyclo*(Leu-Leu) concentration indicated by letters G or PG, where G – complete gelation, PG – partial gelation; <sup>b</sup> after 12 h; <sup>c</sup> after one day; <sup>d</sup> after two days.

**Table S3.** Gelation ability and concentration of *cyclo*(Leu-Leu) in systems with 1 mL of aromatic solvents.<sup>a</sup>

| Solvent          | MGC, mg mL <sup>-1</sup> |                |                |
|------------------|--------------------------|----------------|----------------|
|                  | 1.5                      | 2              | 2.5            |
| Benzene          | G <sup>b</sup>           | G <sup>b</sup> | G <sup>b</sup> |
| Toluene          | G <sup>b</sup>           | G <sup>b</sup> | G <sup>b</sup> |
| <i>o</i> -Xylene | PG <sup>c</sup>          | G <sup>b</sup> | G <sup>b</sup> |
| <i>m</i> -Xylene | G <sup>b</sup>           | G <sup>b</sup> | G <sup>b</sup> |
| <i>p</i> -Xylene | PG <sup>b</sup>          | G <sup>b</sup> | G <sup>c</sup> |
| Ethylbenzene     | G <sup>c</sup>           | G <sup>b</sup> | G <sup>c</sup> |

<sup>a</sup> MGC is the minimum value of *cyclo*(Leu-Leu) concentration indicated by letters G or PG, where G – complete gelation, PG – partial gelation; <sup>b</sup> after six hours, 10 µl of water were added; <sup>c</sup> after 18 hours, 20 µl of water were added.
